# Supplementary material
Source: PubMed Central journal article supplement (PMC6671628)
Supplement: NIHMS1040426-supplement-8.pdf [file NIHMS1040426-supplement-8.pdf]

## REFERENCES (SUPPLEMENTAL)

Ashburner, M., Ball, C.A., Blake, J.A., Botstein, D., Butler, H., Cherry, J.M., Davis, A.P., Dolinski, K., Dwight, S.S., Eppig, J.T., et al. (2000). Gene ontology: tool for the unification of biology. The Gene Ontology Consortium. *Nature Genetics* 25, 25–29.

Canver, M.C., Lessard, S., Pinello, L., Wu, Y., Ilboudo, Y., Stern, E.N., Needleman, A.J., Galactéros, F., Brugnara, C., Kutlar, A., et al. (2017). Variant-aware saturating mutagenesis using multiple Cas9 nucleases identifies regulatory elements at trait-associated loci. *Nature Publishing Group* 49, 625–634.

Das, P.P., Hendrix, D.A., Apostolou, E., Buchner, A.H., Canver, M.C., Beyaz, S., Ljuboja, D., Kuintzle, R., Kim, W., Karnik, R., et al. (2015). PRC2 Is Required to Maintain Expression of the Maternal Gtl2-Rian-Mirg Locus by Preventing De Novo DNA Methylation in Mouse Embryonic Stem Cells. *CellReports* 1–57.

Das, P.P., Shao, Z., Beyaz, S., Apostolou, E., Pinello, L., De Los Angeles, A., O'Brien, K., Atsma, J.M., Fujiwara, Y., Nguyen, M., et al. (2014). Distinct and Combinatorial Functions of Jmjd2b/Kdm4b and Jmjd2c/Kdm4c in Mouse Embryonic Stem Cell Identity. *Molecular Cell* 53, 32–48.

Dennis, G., Sherman, B.T., Hosack, D.A., Yang, J., Gao, W., Lane, H.C., and Lempicki, R.A. (2003). DAVID: Database for Annotation, Visualization, and Integrated Discovery. *Genome Biol.* 4, P3.

Dobin, A., Davis, C.A., Schlesinger, F., Drenkow, J., Zaleski, C., Jha, S., Batut, P., Chaisson, M., and Gingeras, T.R. (2013). STAR: ultrafast universal RNA-seq aligner. *Bioinformatics* 29, 15–21.

Huber, W., Carey, V.J., Gentleman, R., Anders, S., Carlson, M., Carvalho, B.S., Bravo, H.C., Davis, S., Gatto, L., Girke, T., et al. (2015). Orchestrating high-throughput genomic analysis with Bioconductor. *Nature Methods* 12, 115–121.

Kent, W.J., Zweig, A.S., Barber, G., Hinrichs, A.S., and Karolchik, D. (2010). BigWig and BigBed: enabling browsing of large distributed datasets. *Bioinformatics* 26, 2204–2207.

Kim, J., Cantor, A.B., Orkin, S.H., and Wang, J. (2009). Use of in vivo biotinylation to study protein–protein and protein–DNA interactions in mouse embryonic stem cells. *Nat Protoc* 4, 506–517.

Langmead, B., and Salzberg, S.L. (2012). Fast gapped-read alignment with Bowtie 2. *Nature Methods* 9, 357–359.

Love, M.I., Huber, W., and Anders, S. (2014). Moderated estimation of fold change and dispersion for RNA-seq data with DESeq2. *Genome Biol.* 15, 550.

Mouse ENCODE Consortium, Stamatoyannopoulos, J.A., Snyder, M., Hardison, R.,

Ren, B., Gingeras, T., Gilbert, D.M., Groudine, M., Bender, M., Kaul, R., et al. (2012). An encyclopedia of mouse DNA elements (Mouse ENCODE). *Genome Biol.* *13*, 418.

Mudge, J.M., and Harrow, J. (2015). Creating reference gene annotation for the mouse C57BL6/J genome assembly. *Mamm. Genome* *26*, 366–378.

Patro, R., Duggal, G., Love, M.I., Irizarry, R.A., and Kingsford, C. (2017). Salmon provides fast and bias-aware quantification of transcript expression. *Nature Methods* *14*, 417–419.

Quinlan, A.R., and Hall, I.M. (2010). BEDTools: a flexible suite of utilities for comparing genomic features. *Bioinformatics* *26*, 841–842.

Rahl, P.B., Lin, C.Y., Seila, A.C., Flynn, R.A., McCuine, S., Burge, C.B., Sharp, P.A., and Young, R.A. (2010). c-Myc Regulates Transcriptional Pause Release. *Cell* *141*, 432–445.

Ramírez, F., Ryan, D.P., Grüning, B., Bhardwaj, V., Kilpert, F., Richter, A.S., Heyne, S., Dündar, F., and Manke, T. (2016). deepTools2: a next generation web server for deep-sequencing data analysis. *Nucleic Acids Res.* *44*, W160–W165.

Ross-Innes, C.S., Stark, R., Teschendorff, A.E., Holmes, K.A., Ali, H.R., Dunning, M.J., Brown, G.D., Gojis, O., Ellis, I.O., Green, A.R., et al. (2012). Differential oestrogen receptor binding is associated with clinical outcome in breast cancer. *Nature* *481*, 389–393.

Sanjana, N.E., Shalem, O., and Zhang, F. (2014). Improved vectors and genome-wide libraries for CRISPR screening. *Nature Methods* *11*, 783–784.

Shalem, O., Sanjana, N.E., Hartenian, E., Shi, X., Scott, D.A., Mikkelsen, T., Heckl, D., Ebert, B.L., Root, D.E., Doench, J.G., et al. (2014). Genome-scale CRISPR-Cas9 knockout screening in human cells. *Science* *343*, 84–87.

Stadtfeld, M., Maherali, N., Borkent, M., and Hochedlinger, K. (2009). A reprogrammable mouse strain from gene-targeted embryonic stem cells. *Nature Methods* *7*, 53–55.

Sun, Y.B.Y., Qu, X., Howard, V., Dai, L., Jiang, X., Ren, Y., Fu, P., Puellas, V.G., Nikolic-Paterson, D.J., Caruana, G., et al. (2015). Smad3 deficiency protects mice from obesity-induced podocyte injury that precedes insulin resistance. *Kidney Int.* *88*, 286–298.

Whyte, W.A., Orlando, D.A., Hnisz, D., Abraham, B.J., Lin, C.Y., Kagey, M.H., Rahl, P.B., Lee, T.I., and Young, R.A. (2013). Master Transcription Factors and Mediator Establish Super-Enhancers at Key Cell Identity Genes. *Cell* *153*, 307–319.

Zhang, Y., Liu, T., Meyer, C.A., Eeckhoute, J., Johnson, D.S., Bernstein, B.E., Nusbaum, C., Myers, R.M., Brown, M., Li, W., et al. (2008). Model-based analysis of

ChIP-Seq (MACS). *Genome Biol.* 9, R137.
